# Supplementary material for: Recapitulation of dynamic nanoparticle transport around tumors using a triangular multi-chamber tumor-on-a-chip
Source: Royal Society of Chemistry journal article supplement (doi:10.1039/d2lc00631f), 2022-01-01
Supplement: d2lc00631f1.pdf [file d2lc00631f1.pdf]

**Supplementary materials:**

**Recapitulation of dynamic nanoparticle transport around tumor  
using a triangular multi-chamber tumor-on-a-chip**

You Chen, Yifan Xue, Langtao Xu, Weilin Li, Yiling Chen, Shunan Zheng, Rui Dai,  
Jie Liu\*

*School of Biomedical Engineering, Shenzhen Campus of Sun Yat-sen University,  
Guangming District, Shenzhen, Guangdong, 518107, China*

**\* Corresponding Authors:**

Prof. Jie Liu

Email: [liujie56@mail.sysu.edu.cn](mailto:liujie56@mail.sysu.edu.cn)

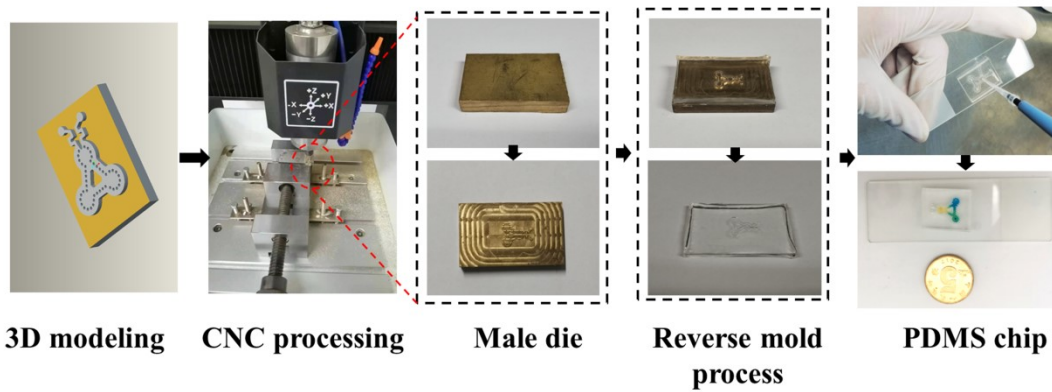

**Fig.S1.** The process of designing, machining, and packaging of a triangular multi-chamber tumor-on-a-chip.

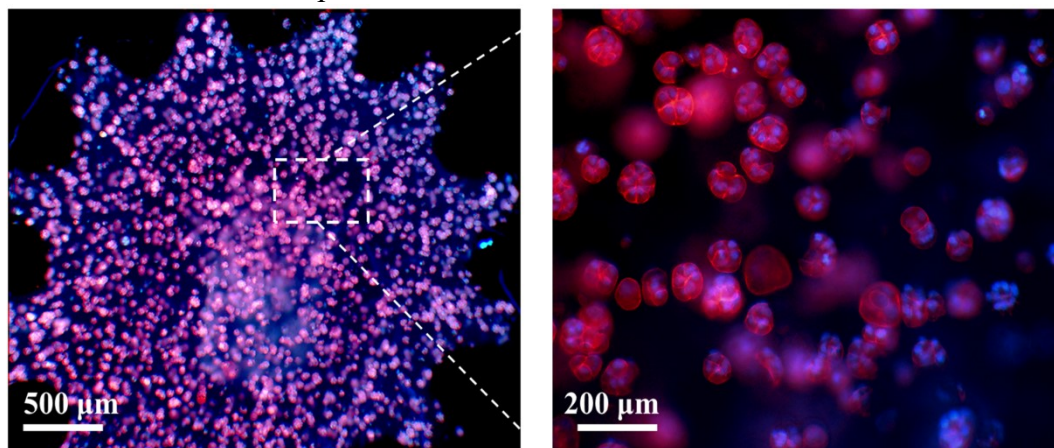

**Fig.S2.** F-actin staining results of the MCF-7 spheroids cultured in the TM-CTC platform for 7 days. The MCF-7 spheroids exhibited uniform size and distributed throughout the culture chamber.

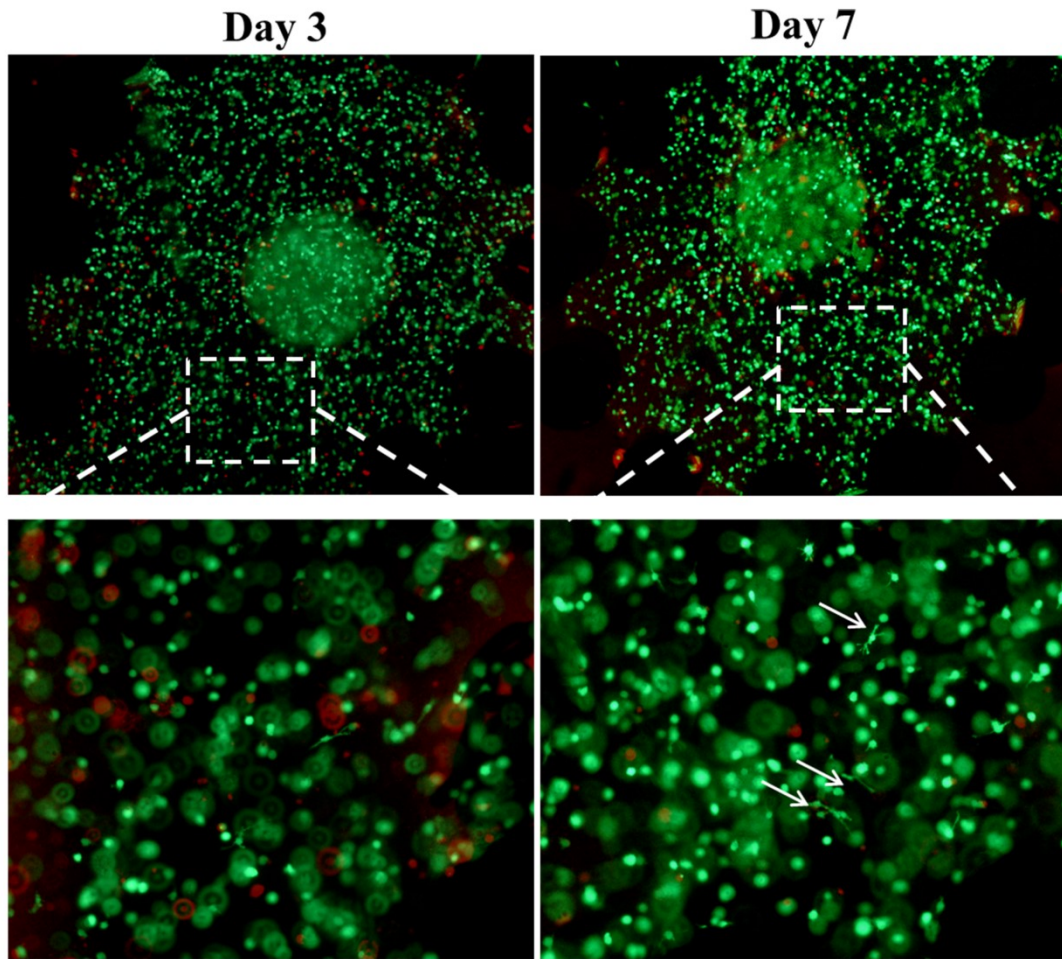

**Fig.S3** Results of live/dead staining of HUVEC cells after 3 days and 7 days of culture on the TM-CTC platform. The cells showed good proliferative activity, and some well-spread cells were observed (white arrow).
